# Supplementary material for: Velvet Family Members Regulate Pigment Synthesis of the Fruiting Bodies of Auricularia cornea
Source: MDPI journal article supplement (doi:10.3390/jof9040412), 2023-03-27
Supplement: s1 [file s1]

**Table S7.** PTG series fine mapping primers

| <b>Primer number</b> | <b>Left Primer</b>      | <b>TM(°C)</b> | <b>Right Primer</b>    | <b>TM(°C)</b> |
|----------------------|-------------------------|---------------|------------------------|---------------|
| PTG-1                | gctctccatgaatgggtgaagct | 61            | cacccttcagaagtcggg     | 60            |
| PTG-2                | tcgtcatcgccctgagcaac    | 61            | taggtgcagaccctctctgt   | 61            |
| PTG-4                | cggcaccgacttcggaag      | 60            | ttgcgcaaaggctgcttctc   | 61            |
| PTG-10               | ggccgcagcagctcaaca      | 62            | cacgctgcaaggaacggt     | 60            |
| PTG-11               | gttgctgccagcttcgct      | 60            | cgacatcgtcgtgccagc     | 61            |
| PTG-20               | ggatatacccgctctcgcaatcc | 60            | ccgttatggcacaagccagc   | 60            |
| PTG-21               | agacctcgtaattgacggcaac  | 60            | cgtcgaggctgcagtatcaagc | 61            |
