# Supplementary material for: Velvet Family Members Regulate Pigment Synthesis of the Fruiting Bodies of Auricularia cornea
Source: MDPI journal article supplement (doi:10.3390/jof9040412), 2023-03-27
Supplement: s1 [file s1]

**Table S5.** Fruiting body color of selfing strains and the types of corresponding monokaryotic strains

| Monokaryon of mapping population | Mated with 23 | Mated with 51 | Color of fruiting body | Monokaryon type |
|----------------------------------|---------------|---------------|------------------------|-----------------|
| 1                                | —             | +             | P                      | P <sub>d</sub>  |
| 2                                | —             | +             | W                      | P <sub>r</sub>  |
| 3                                | —             | +             | P                      | W <sub>r</sub>  |
| 4                                | —             | +             | W                      | P <sub>r</sub>  |
| 5                                | +             | —             | W                      | W <sub>d</sub>  |
| 6                                | —             | +             | P                      | P <sub>d</sub>  |
| 7                                | +             | —             | W                      | P <sub>r</sub>  |
| 8                                | +             | —             | *                      | *               |
| 9                                | +             | —             | W                      | W <sub>d</sub>  |
| 10                               | +             | —             | W                      | W <sub>d</sub>  |
| 12                               | +             | —             | *                      | *               |
| 13                               | +             | —             | W                      | W <sub>d</sub>  |
| 14                               | +             | —             | W                      | W <sub>d</sub>  |
| 15                               | +             | —             | *                      | *               |
| 17                               | —             | +             | P                      | W <sub>r</sub>  |
| 18                               | +             | —             | P                      | P <sub>d</sub>  |
| 19                               | —             | +             | P                      | P <sub>d</sub>  |
| 21                               | —             | +             | W                      | W <sub>d</sub>  |
| 22                               | —             | +             | *                      | *               |
| 23                               | —             | +             | W                      | P <sub>r</sub>  |
| 26                               | +             | —             | W                      | W <sub>d</sub>  |
| 27                               | +             | —             | P                      | W <sub>r</sub>  |
| 30                               | +             | —             | P                      | W <sub>r</sub>  |
| 31                               | +             | —             | P                      | P <sub>d</sub>  |
| 32                               | +             | —             | P                      | W <sub>r</sub>  |
| 34                               | —             | +             | W                      | W <sub>d</sub>  |
| 35                               | +             | —             | W                      | W <sub>d</sub>  |
| 36                               | +             | —             | *                      | *               |
| 37                               | —             | +             | P                      | W <sub>r</sub>  |
| 38                               | +             | —             | W                      | W <sub>d</sub>  |
| 39                               | +             | —             | P                      | W <sub>r</sub>  |
| 40                               | —             | +             | W                      | W <sub>d</sub>  |
| 41                               | +             | —             | P                      | W <sub>r</sub>  |
| 42                               | +             | —             | *                      | *               |
| 43                               | +             | —             | *                      | *               |
| 45                               | +             | —             | *                      | *               |
| 46                               | +             | —             | *                      | *               |
| 47                               | —             | +             | W                      | W <sub>d</sub>  |
| 48                               | +             | —             | P                      | P <sub>d</sub>  |
| 49                               | +             | —             | *                      | *               |
| 50                               | —             | +             | *                      | *               |
| 51                               | +             | —             | W                      | P <sub>r</sub>  |
| 52                               | —             | +             | W                      | W <sub>d</sub>  |
| 53                               | +             | —             | *                      | *               |
| 54                               | —             | +             | P                      | W <sub>r</sub>  |

|     |   |   |   |                |
|-----|---|---|---|----------------|
| 55  | + | — | P | P <sub>d</sub> |
| 56  | + | — | P | P <sub>d</sub> |
| 57  | + | — | W | W <sub>d</sub> |
| 58  | + | — | * | *              |
| 59  | + | — | P | W <sub>r</sub> |
| 60  | + | — | W | W <sub>d</sub> |
| 61  | — | + | * | *              |
| 62  | — | + | P | W <sub>r</sub> |
| 63  | — | + | * | *              |
| 65  | — | + | P | P <sub>d</sub> |
| 66  | + | — | P | P <sub>d</sub> |
| 67  | + | — | W | P <sub>r</sub> |
| 68  | — | + | W | W <sub>d</sub> |
| 69  | + | — | W | W <sub>d</sub> |
| 71  | + | — | W | W <sub>d</sub> |
| 72  | — | + | * | *              |
| 73  | + | — | P | P <sub>d</sub> |
| 74  | + | — | * | *              |
| 76  | + | — | W | W <sub>d</sub> |
| 77  | + | — | * | *              |
| 79  | + | — | * | *              |
| 80  | — | + | W | W <sub>d</sub> |
| 81  | + | — | * | *              |
| 82  | + | — | W | W <sub>d</sub> |
| 83  | + | — | P | P <sub>d</sub> |
| 84  | + | — | W | P <sub>r</sub> |
| 85  | + | — | P | W <sub>r</sub> |
| 86  | + | — | P | W <sub>r</sub> |
| 87  | + | — | * | *              |
| 88  | — | + | P | P <sub>d</sub> |
| 89  | — | + | * | *              |
| 91  | + | — | * | *              |
| 92  | + | — | P | W <sub>r</sub> |
| 93  | — | + | * | *              |
| 94  | — | + | W | W <sub>d</sub> |
| 95  | — | + | P | P <sub>d</sub> |
| 96  | — | + | * | *              |
| 97  | — | + | P | W <sub>r</sub> |
| 98  | + | — | W | W <sub>d</sub> |
| 99  | — | + | P | W <sub>r</sub> |
| 100 | — | + | W | W <sub>d</sub> |
| 101 | + | — | P | W <sub>r</sub> |

\* "P" represents the color of the fruiting body is purple. "W" represents the color of the fruiting body is white. " \* " represents cross was successful but didn't produce fruiting body.
