# Supplementary material for: Velvet Family Members Regulate Pigment Synthesis of the Fruiting Bodies of Auricularia cornea
Source: MDPI journal article supplement (doi:10.3390/jof9040412), 2023-03-27
Supplement: s1 [file s1]

**Table S2.** Primer of RT-qPCR

| <b>Primer<br/>number</b> | <b>Left Primer</b>     | <b>TM(°C)</b> | <b>Right Primer</b>   | <b>TM(°C)</b> |
|--------------------------|------------------------|---------------|-----------------------|---------------|
| <i>AcveA-1</i>           | GGCGCTACCTCGTATGTCTGG  | 62            | CGATAACCTCCCCAGGCAACC | 62            |
| <i>AcveA-2</i>           | TCAGGCCTTGCCGTTGACAG   | 62            | CGTCGTCCAAGGCATCCGT   | 62            |
| <i>AcvelB-1</i>          | CCGCAACGTGAATGATGCTGAG | 61            | CGGCCGTGGATCTCTGGTC   | 61            |
| <i>AcvelB-2</i>          | TTACTCGACCCGTGGCGG     | 62            | GCGTTGTCGATTGCGTTCGG  | 61            |
