# Supplementary material for: Velvet Family Members Regulate Pigment Synthesis of the Fruiting Bodies of Auricularia cornea
Source: MDPI journal article supplement (doi:10.3390/jof9040412), 2023-03-27
Supplement: s1 [file s1]

**Table S4.** Fruiting body color of selfing population of ACW001-33×ACP004-33

| <div><div><div><div><div></div><div><math>A_{p1}</math></div></div><div><math>A_{w1}</math></div></div></div></div> | 3   | 6   | 17  | 22  | 23  | 34  | 40  | 47  | 50  | 54  | 62  | 68  | 72  | 80  | 88  |
|---------------------------------------------------------------------------------------------------------------------|-----|-----|-----|-----|-----|-----|-----|-----|-----|-----|-----|-----|-----|-----|-----|
|                                                                                                                     | (W) | (P) | (W) | (W) | (P) | (W) | (P) |
| 5 (W)                                                                                                               | *   | P   | W   | *   | W   | W   | W   | *   | W   | *   | *   | *   | *   | W   | P   |
| 7 (P)                                                                                                               | P   | P   | P   | W   | W   | *   | W   | W   | W   | P   | P   | W   | *   | W   | P   |
| 9 (W)                                                                                                               | W   | P   | W   | W   | W   | W   | W   | *   | W   | W   | W   | W   | W   | W   | P   |
| 14 (W)                                                                                                              | *   | P   | W   | W   | W   | *   | W   | W   | W   | *   | W   | W   | *   | W   | P   |
| 26 (W)                                                                                                              | *   | P   | *   | *   | W   | *   | *   | W   | W   | W   | *   | W   | *   | W   | *   |
| 38 (W)                                                                                                              | W   | P   | W   | W   | W   | W   | W   | W   | W   | W   | W   | W   | *   | *   | P   |
| 45 (W)                                                                                                              | W   | *   | *   | *   | *   | *   | W   | *   | *   | W   | *   | W   | *   | W   | *   |
| 48 (P)                                                                                                              | *   | P   | P   | P   | P   | P   | P   | P   | P   | P   | P   | *   | *   | P   | *   |
| 51 (P)                                                                                                              | P   | P   | P   | *   | W   | W   | W   | W   | *   | P   | P   | W   | *   | W   | P   |
| 56 (P)                                                                                                              | *   | P   | P   | P   | P   | P   | *   | P   | P   | *   | *   | P   | *   | *   | P   |
| 71 (W)                                                                                                              | W   | *   | W   | *   | W   | W   | *   | W   | W   | *   | W   | W   | W   | *   | P   |
| 76 (W)                                                                                                              | W   | P   | W   | *   | W   | *   | *   | *   | W   | *   | *   | W   | *   | W   | *   |
| 86 (W)                                                                                                              | *   | *   | W   | W   | P   | W   | W   | W   | W   | *   | W   | W   | W   | W   | P   |
| 91 (W)                                                                                                              | W   | P   | *   | W   | *   | W   | *   | *   | W   | W   | *   | W   | *   | W   | P   |

\* “P” represents the color of the fruiting body is purple. “W” represents the color of the fruiting body is white. “ \* ” represents cross was successful but didn’t produce fruiting body.
