# Supplementary material for: Velvet Family Members Regulate Pigment Synthesis of the Fruiting Bodies of Auricularia cornea
Source: MDPI journal article supplement (doi:10.3390/jof9040412), 2023-03-27
Supplement: s1 [file s1]

**Table S3.** Monokaryons and the fruiting body color of backcross population

| <b>Monokaryotic<br/>strain number of<br/>mapping<br/>population</b> | <b>Backcrossed with<br/>ACW001-33</b> | <b>Backcrossed with<br/>ACP004-33</b> | <b>Color of fruiting<br/>body</b> |
|---------------------------------------------------------------------|---------------------------------------|---------------------------------------|-----------------------------------|
| 1                                                                   | +                                     | —                                     | P                                 |
| 2                                                                   | +                                     | —                                     | W                                 |
| 3                                                                   | +                                     | —                                     | W                                 |
| 4                                                                   | +                                     | —                                     | W                                 |
| 5                                                                   | —                                     | +                                     | P                                 |
| 6                                                                   | +                                     | —                                     | P                                 |
| 7                                                                   | —                                     | +                                     | P                                 |
| 8                                                                   | —                                     | +                                     | P                                 |
| 9                                                                   | —                                     | +                                     | P                                 |
| 10                                                                  | —                                     | +                                     | P                                 |
| 12                                                                  | —                                     | +                                     | P                                 |
| 13                                                                  | —                                     | +                                     | P                                 |
| 14                                                                  | —                                     | +                                     | P                                 |
| 15                                                                  | —                                     | +                                     | P                                 |
| 17                                                                  | +                                     | —                                     | W                                 |
| 18                                                                  | —                                     | +                                     | P                                 |
| 19                                                                  | +                                     | —                                     | P                                 |
| 21                                                                  | +                                     | —                                     | W                                 |
| 22                                                                  | +                                     | —                                     | W                                 |
| 23                                                                  | +                                     | —                                     | W                                 |
| 26                                                                  | —                                     | +                                     | P                                 |
| 27                                                                  | —                                     | +                                     | P                                 |
| 30                                                                  | —                                     | +                                     | P                                 |
| 31                                                                  | —                                     | +                                     | P                                 |
| 32                                                                  | —                                     | +                                     | P                                 |
| 34                                                                  | +                                     | —                                     | W                                 |
| 35                                                                  | —                                     | +                                     | P                                 |
| 36                                                                  | —                                     | +                                     | P                                 |
| 37                                                                  | +                                     | —                                     | W                                 |
| 38                                                                  | —                                     | +                                     | P                                 |
| 39                                                                  | —                                     | +                                     | P                                 |
| 40                                                                  | +                                     | —                                     | W                                 |
| 41                                                                  | —                                     | +                                     | P                                 |
| 42                                                                  | —                                     | +                                     | P                                 |
| 43                                                                  | —                                     | +                                     | P                                 |
| 45                                                                  | —                                     | +                                     | P                                 |
| 46                                                                  | —                                     | +                                     | P                                 |
| 47                                                                  | +                                     | —                                     | W                                 |
| 48                                                                  | —                                     | +                                     | P                                 |
| 49                                                                  | —                                     | +                                     | P                                 |
| 50                                                                  | +                                     | —                                     | W                                 |
| 51                                                                  | —                                     | +                                     | P                                 |
| 52                                                                  | +                                     | —                                     | W                                 |
| 53                                                                  | —                                     | +                                     | P                                 |

|     |   |   |   |
|-----|---|---|---|
| 54  | + | — | W |
| 55  | — | + | P |
| 56  | — | + | P |
| 57  | — | + | P |
| 58  | — | + | P |
| 59  | — | + | P |
| 60  | — | + | P |
| 61  | + | — | P |
| 62  | + | — | W |
| 63  | + | — | P |
| 65  | + | — | P |
| 66  | — | + | P |
| 67  | — | + | P |
| 68  | + | — | W |
| 69  | — | + | P |
| 71  | — | + | P |
| 72  | + | — | W |
| 73  | — | + | P |
| 74  | — | + | P |
| 76  | — | + | P |
| 77  | — | + | P |
| 79  | — | + | P |
| 80  | + | — | W |
| 81  | — | + | P |
| 82  | — | + | P |
| 83  | — | + | P |
| 84  | — | + | P |
| 85  | — | + | P |
| 86  | — | + | P |
| 87  | — | + | P |
| 88  | + | — | P |
| 89  | + | — | W |
| 91  | — | + | P |
| 92  | — | + | P |
| 93  | + | — | W |
| 94  | + | — | W |
| 95  | + | — | P |
| 96  | + | — | W |
| 97  | + | — | W |
| 98  | — | + | P |
| 99  | + | — | W |
| 100 | + | — | W |
| 101 | — | + | P |

\* “P” represents the color of the fruiting body is purple. “W” represents the color of the fruiting body is white.
