# Supplementary material for: Velvet Family Members Regulate Pigment Synthesis of the Fruiting Bodies of Auricularia cornea
Source: MDPI journal article supplement (doi:10.3390/jof9040412), 2023-03-27
Supplement: s1 [file s1]

Table S1. Primer of SSR

| Primer number | Left Primer              | TM(°C) | Right Primer             | TM(°C) |
|---------------|--------------------------|--------|--------------------------|--------|
| SSR-1         | ccattgatttattcgaccaaagtt | 60.443 | gtgtgttgggtttgtgggac     | 61.134 |
| SSR-4         | gcattctcagcatcgaagacata  | 61.626 | ctgagcagcagcctcctctt     | 62.314 |
| SSR-6         | agcgagttcgacgtgtcttc     | 60.599 | gtcccaactttggttggtt      | 61.275 |
| SSR-8         | aactctctgggaattcatatggc  | 60.679 | ctctcagcgatgaaagctcac    | 60.292 |
| SSR-12        | attaccctgaacactgtcattgg  | 60.158 | ctgccttgagtcattgttgtagt  | 60.594 |
| SSR-462       | gagtgaacgcttattcaccatct  | 59.672 | cgggggatataatttatctaggg  | 59.052 |
| SSR-464       | gttatagccttcgagtcggattt  | 60.007 | agaacctagaggctctttccgt   | 59.915 |
| SSR-466       | gtaacatgaagtcgccacc      | 60.384 | gatgaactacacataccaaggctg | 59.954 |
| SSR-470       | cttgagatctgaacctgaaacg   | 62.472 | gggaggatgaaggagactaaacc  | 61.495 |
| SSR-476       | ggctctgggggtgtacgtcgag   | 62.89  | cacagctcgaaatcccacaa     | 62.175 |
| SSR-959       | ggctctgggggtgtacgtcgag   | 62.89  | cacagctcgaaatcccacaa     | 62.175 |
| SSR-960       | taatgcttctgtcttcttccc    | 60.924 | cgtgatctacatgctgtcaaaga  | 60.319 |
| SSR-965       | gagactcgaacagcggacaag    | 62.447 | cccactcaccgactcctctc     | 62.223 |
| SSR-966       | tttagaggggatgtgaggtagc   | 60.82  | ctgagcaggctcttcccttac    | 60.522 |
| SSR-1321      | gtcttcgagcgtgtgtagatga   | 60.462 | ctcgttggaattccagcctac    | 59.694 |
| SSR-1326      | gttcaggttgcgtaaaatga     | 59.989 | ccaagcgtcaaagataggtaaaa  | 59.687 |
| SSR-1328      | gtgcegttaatctttctcatcc   | 59.972 | atacgagtgtatgatccacagg   | 60.144 |
| SSR-1329      | tacgctgacgaaaagtccga     | 61.869 | cacatgcatctggacacaagag   | 61.712 |
| SSR-1331      | cagaaagcccttcaacctagaat  | 60.134 | gagtctgataccgactcttcgc   | 60.411 |
| SSR-1337      | gtagagctggaattggctgtg    | 59.89  | atcaagcgtcatcatgtcaaaa   | 60.511 |
| SSR-1341      | agctgctgtactctcagtcgg    | 59.824 | cactccatctccatcgacac     | 59.05  |
| SSR-1734      | ttatgtatatagctccgaagcgg  | 59.67  | caactgatagatcccgtatgac   | 60     |
| SSR-1742      | ggtttatttggctgtgtttgtt   | 59.236 | aatagcattgcgatactgaaacag | 59.725 |
| SSR-1745      | gacataaactgtgcagtgctgg   | 59.576 | gctgctccattgagaaagagat   | 59.99  |
| SSR-1752      | ctacagccacttcaacagcatc   | 58.988 | ccctggatttattgagacatc    | 59.717 |
| SSR-1759      | caaccgacccttgactctc      | 62.009 | gaggcgagtactcctcatcagc   | 62.696 |
| SSR-1769      | ttgcgcatgatatcgtagtagt   | 60.875 | aggatgtatgctgggtccaat    | 60.593 |
| SSR-2165      | aaccaaacttaacctaaccac    | 59.591 | tgcacaaaaaactgatttagc    | 60.173 |
| SSR-2171      | ttaggggtactgctcctcaactg  | 59.827 | gcaaacttcgcaaggagatt     | 59.457 |
| SSR-2179      | actcatgtttgtccttgctgaat  | 60.054 | gttgccctgtactcaaggtagc   | 60.95  |
| SSR-2183      | caagaagattatcatgacgcaga  | 59.375 | tcaagtactgagagaaaaacgcc  | 59.941 |
| SSR-2193      | cagatgaccattctgcgta      | 59.673 | cactcgctcgagaaatacctg    | 60.023 |

|          |                          |        |                           |        |
|----------|--------------------------|--------|---------------------------|--------|
| SSR-2206 | agcctttacgccacaacctac    | 60.547 | tgctgagatacttgtgcagactc   | 59.699 |
| SSR-2474 | aaggtcgaagttaccagggc     | 60.496 | taatcctcctggggatcgag      | 61.307 |
| SSR-2482 | acagcaacggtatctcatctcat  | 60.04  | gaacggaaacgaaaaataaggat   | 59.755 |
| SSR-2483 | gagttgaggggtggctctct     | 60.504 | actgtctacgctttacaaatggttc | 60.008 |
| SSR-2487 | ccacacgtactaccacatcatcc  | 61.465 | atthttgtcccagagcgtgggt    | 61.84  |
| SSR-2491 | gaagacacgtatacgcacattca  | 60.074 | aacgcgtattactgcatcaactt   | 60.095 |
| SSR-2499 | actacggtgagtcgacagcg     | 61.469 | gtgcagttctgaacgaaagagtc   | 60.47  |
| SSR-2503 | caacaacgtcgtctataattggg  | 60.63  | tgataatgttcgctacgactg     | 61.065 |
| SSR-2507 | gcctcaaatactgtgggtttatc  | 59.756 | cggataattgtctctggtttctg   | 60.008 |
| SSR-2511 | gatagcgacagtgacacagacag  | 59.991 | gtagagcgagcgtttgacctt     | 60.937 |
| SSR-2836 | accactatgccagtgttcgag    | 60.186 | agactgctgaagagagtggtcag   | 60.242 |
| SSR-2848 | aaggagataccaggtgtgtttt   | 60.155 | aaagggtacatcactcacaggaa   | 59.914 |
| SSR-2863 | gatgagagagcataggatg      | 60.733 | aagaagctcactgctgaggtg     | 59.801 |
| SSR-3096 | gagggtccatcctgttcatgc    | 60.484 | ctcactcactcgccgatagc      | 61.107 |
| SSR-3098 | aacagtgtatgcttgctgtatgtg | 60.13  | tcttctctggctgtgatctctct   | 59.776 |
| SSR-3104 | attccacaggaatttcatggc    | 61.068 | gcacacgaggttaacctcttaca   | 61.311 |
| SSR-3122 | ctgatgtacactctgctgctcac  | 60.133 | ggaacagcgatatcttctgata    | 59.606 |
| SSR-3124 | aagaaacacattttgcgctgtat  | 60.076 | ttgtagtgcggcactcgtatta    | 59.72  |
| SSR-3137 | gtctgatttcgcaacgacag     | 59.445 | attatagaacatcctcgccgtta   | 59.082 |
| SSR-3279 | gactacttctaccgcactccaaa  | 59.833 | cttcacgagtgggacaaagtc     | 59.754 |
| SSR-3290 | gatactacgattgcagtcagcg   | 59.933 | aaggcgagagtctccaactatg    | 59.907 |
| SSR-3297 | agggaacaaaagggaataaggt   | 60.426 | atgctgtttccacagaaaaacac   | 60.438 |
